# Supplementary material for: A quasi‐Monte‐Carlo comparison of parametric and semiparametric regression methods for heavy‐tailed and non‐normal data: an application to healthcare costs
Source: PubMed Central journal article supplement (PMC5053270; doi:10.1111/rssa.12141), 2015-10-15
Supplement: RSSA-179-951-s001.pdf [file RSSA-179-951-s001.pdf]

## Appendix A

We use the variables shown in Table A1 to construct our regression models. They are based on the ICD10 chapters, which are given in Table A2.

| Variable name | Variable description                                                                                                                                                                                                                                                                                                                                                                                                                                                                                                                                                                                                                                                                                                                                                                                                                                                                                                                                                      |
|---------------|---------------------------------------------------------------------------------------------------------------------------------------------------------------------------------------------------------------------------------------------------------------------------------------------------------------------------------------------------------------------------------------------------------------------------------------------------------------------------------------------------------------------------------------------------------------------------------------------------------------------------------------------------------------------------------------------------------------------------------------------------------------------------------------------------------------------------------------------------------------------------------------------------------------------------------------------------------------------------|
| epiA          | Intestinal infectious diseases, Tuberculosis, Certain zoonotic bacterial diseases, Other bacterial diseases, Infections with a predominantly sexual mode of transmission, Other spirochaetal diseases, Other diseases caused by chlamydiae, Rickettsioses, Viral infections of the central nervous system, Arthropod-borne viral fevers and viral haemorrhagic fevers                                                                                                                                                                                                                                                                                                                                                                                                                                                                                                                                                                                                     |
| epiB          | Viral infections characterized by skin and mucous membrane lesions, Viral hepatitis, HIV disease, Other viral diseases, Mycoses, Protozoal diseases, Helminthiases, Pediculosis, acaiasis and other infestations, Sequelae of infectious and parasitic diseases, Bacterial, viral and other infectious agents, Other infectious diseases                                                                                                                                                                                                                                                                                                                                                                                                                                                                                                                                                                                                                                  |
| epiC          | Malignant neoplasms                                                                                                                                                                                                                                                                                                                                                                                                                                                                                                                                                                                                                                                                                                                                                                                                                                                                                                                                                       |
| epiD          | In situ neoplasms, Benign neoplasms, Neoplasms of uncertain or unknown behaviour and III                                                                                                                                                                                                                                                                                                                                                                                                                                                                                                                                                                                                                                                                                                                                                                                                                                                                                  |
| epiE          | IV                                                                                                                                                                                                                                                                                                                                                                                                                                                                                                                                                                                                                                                                                                                                                                                                                                                                                                                                                                        |
| epiF          | V                                                                                                                                                                                                                                                                                                                                                                                                                                                                                                                                                                                                                                                                                                                                                                                                                                                                                                                                                                         |
| epiG          | VI                                                                                                                                                                                                                                                                                                                                                                                                                                                                                                                                                                                                                                                                                                                                                                                                                                                                                                                                                                        |
| epiH          | VII and VIII                                                                                                                                                                                                                                                                                                                                                                                                                                                                                                                                                                                                                                                                                                                                                                                                                                                                                                                                                              |
| epiI          | IX                                                                                                                                                                                                                                                                                                                                                                                                                                                                                                                                                                                                                                                                                                                                                                                                                                                                                                                                                                        |
| epiJ          | X                                                                                                                                                                                                                                                                                                                                                                                                                                                                                                                                                                                                                                                                                                                                                                                                                                                                                                                                                                         |
| epiK          | XI                                                                                                                                                                                                                                                                                                                                                                                                                                                                                                                                                                                                                                                                                                                                                                                                                                                                                                                                                                        |
| epiL          | XII                                                                                                                                                                                                                                                                                                                                                                                                                                                                                                                                                                                                                                                                                                                                                                                                                                                                                                                                                                       |
| epiM          | XIII                                                                                                                                                                                                                                                                                                                                                                                                                                                                                                                                                                                                                                                                                                                                                                                                                                                                                                                                                                      |
| epiN          | XIV                                                                                                                                                                                                                                                                                                                                                                                                                                                                                                                                                                                                                                                                                                                                                                                                                                                                                                                                                                       |
| epiOP         | XV and XVI                                                                                                                                                                                                                                                                                                                                                                                                                                                                                                                                                                                                                                                                                                                                                                                                                                                                                                                                                                |
| epiQ          | XVII                                                                                                                                                                                                                                                                                                                                                                                                                                                                                                                                                                                                                                                                                                                                                                                                                                                                                                                                                                      |
| epiR          | XVIII                                                                                                                                                                                                                                                                                                                                                                                                                                                                                                                                                                                                                                                                                                                                                                                                                                                                                                                                                                     |
| epiS          | Injuries to the head, Injuries to the neck, Injuries to the thorax, Injuries to the abdomen, lower back, lumbar spine and pelvis, Injuries to the shoulder and upper arm, Injuries to the elbow and forearm, Injuries to the wrist and hand, Injuries to the hip and thigh, Injuries to the knee and lower leg, Injuries to the ankle and foot                                                                                                                                                                                                                                                                                                                                                                                                                                                                                                                                                                                                                            |
| epiT          | Injuries involving multiple body regions, Injuries to unspecified part of trunk, limb or body region, Effects of foreign body entering through natural orifice, Burns and Corrosions, Frostbite, Poisoning by drugs, medicaments and biological substances, Toxic effects of substances chiefly nonmedicinal as to source, Other and unspecified effects of external causes, Certain early complications of trauma, Complications of surgical and medical care, not elsewhere classified, Sequelae of injuries, of poisoning and of other consequences of external causes                                                                                                                                                                                                                                                                                                                                                                                                 |
| epiU          | XXII                                                                                                                                                                                                                                                                                                                                                                                                                                                                                                                                                                                                                                                                                                                                                                                                                                                                                                                                                                      |
| epiV          | Transport accidents                                                                                                                                                                                                                                                                                                                                                                                                                                                                                                                                                                                                                                                                                                                                                                                                                                                                                                                                                       |
| epiW          | Falls, Exposure to inanimate mechanical forces, Exposure to animate mechanical forces, Accidental drowning and submersion, Other accidental threats to breathing, Exposure to electric current, radiation and extreme ambient air temperature and pressure                                                                                                                                                                                                                                                                                                                                                                                                                                                                                                                                                                                                                                                                                                                |
| epiX          | Exposure to smoke, fire and flames, Contact with heat and hot substances, Contact with venomous animals and plants, Exposure to forces of nature, Accidental poisoning by and exposure to noxious substances, Overexertion, travel and privation, Accidental exposure to other and unspecified factors, Intentional self-harm, Assault by drugs, medicaments and biological substances, Assault by corrosive substance, Assault by pesticides, Assault by gases and vapours, Assault by other specified chemicals and noxious substances, Assault by unspecified chemical or noxious substance, Assault by hanging, strangulation and suffocation, Assault by drowning and submersion, Assault by handgun discharge, Assault by rifle, shotgun and larger firearm discharge, Assault by other and unspecified firearm discharge, Assault by explosive material, Assault by smoke, fire and flames, Assault by steam, hot vapours and hot objects, Assault by sharp object |
| epiY          | Assault by blunt object, Assault by pushing from high place, Assault by pushing or placing victim before moving object, Assault by crashing of motor vehicle, Assault by bodily force, Sexual assault by bodily force, Neglect and abandonment, Other maltreatment syndromes, Assault by other specified means, Assault by unspecified means, Event of undetermined intent, Legal intervention and operations of war, Complications of medical and surgical care, Sequelae of external causes of morbidity and mortality, Supplementary factors related to causes of morbidity and mortality classified else                                                                                                                                                                                                                                                                                                                                                              |
| epiZ          | XXI                                                                                                                                                                                                                                                                                                                                                                                                                                                                                                                                                                                                                                                                                                                                                                                                                                                                                                                                                                       |

Table A1: Classification of morbidity characteristics

ICD10 codes beginning with U were dropped because there were no observations in the 6,164,114 used. Only a small number (3,170) were found of those beginning with P and so these were combined with those beginning with O - owing to the clinical similarities.

| <b>Chapter</b> | <b>Blocks</b> | <b>Title</b>                                                                                        |
|----------------|---------------|-----------------------------------------------------------------------------------------------------|
| I              | A00-B99       | Certain infectious and parasitic diseases                                                           |
| II             | C00-D48       | Neoplasms                                                                                           |
| III            | D50-D89       | Diseases of the blood and blood-forming organs and certain disorders involving the immune mechanism |
| IV             | E00-E90       | Endocrine, nutritional and metabolic diseases                                                       |
| V              | F00-F99       | Mental and behavioural disorders                                                                    |
| VI             | G00-G99       | Diseases of the nervous system                                                                      |
| VII            | H00-H59       | Diseases of the eye and adnexa                                                                      |
| VIII           | H60-H95       | Diseases of the ear and mastoid process                                                             |
| IX             | I00-I99       | Diseases of the circulatory system                                                                  |
| X              | J00-J99       | Diseases of the respiratory system                                                                  |
| XI             | K00-K93       | Diseases of the digestive system                                                                    |
| XII            | L00-L99       | Diseases of the skin and subcutaneous tissue                                                        |
| XIII           | M00-M99       | Diseases of the musculoskeletal system and connective tissue                                        |
| XIV            | N00-N99       | Diseases of the genitourinary system                                                                |
| XV             | O00-O99       | Pregnancy, childbirth and the puerperium                                                            |
| XVI            | P00-P96       | Certain conditions originating in the perinatal period                                              |
| XVII           | Q00-Q99       | Congenital malformations, deformations and chromosomal abnormalities                                |
| XVIII          | R00-R99       | Symptoms, signs and abnormal clinical and laboratory findings, not elsewhere classified             |
| XIX            | S00-T98       | Injury, poisoning and certain other consequences of external causes                                 |
| XX             | V01-Y98       | External causes of morbidity and mortality                                                          |
| XXI            | Z00-Z99       | Factors influencing health status and contact with health services                                  |
| XXII           | U00-U99       | Codes for special purposes                                                                          |

Table A2: ICD10 chapter codes
