# Supplementary material for: A quasi‐Monte‐Carlo comparison of parametric and semiparametric regression methods for heavy‐tailed and non‐normal data: an application to healthcare costs
Source: PubMed Central journal article supplement (PMC5053270; doi:10.1111/rssa.12141), 2015-10-15
Supplement: RSSA-179-951-s002.pdf [file RSSA-179-951-s002.pdf]

# 1 Appendix B

Online only, not for print publication.

| Model             | Sample size |        |         |
|-------------------|-------------|--------|---------|
|                   | 10,000      | 50,000 | 100,000 |
| <b>OLS</b>        | -           | -      | -       |
| <b>LOGOLSHET</b>  | 100%        | 100%   | 100%    |
| <b>SQRTOLSHET</b> | 0%          | 44%    | 100%    |
| <b>GLMLOGP</b>    | 46%         | 100%   | 100%    |
| <b>GLMLOGG</b>    | 100%        | 100%   | 100%    |
| <b>GLMSQRTP</b>   | 0%          | 13%    | 79%     |
| <b>GLMSQRTG</b>   | 42%         | 100%   | 100%    |
| <b>LOGNORM</b>    | 99%         | 100    | 100%    |
| <b>GG</b>         | 99%         | 100%   | 100%    |
| <b>GB2LOG</b>     | 100%        | 100%   | 100%    |
| <b>GB2SQRT</b>    | 100%        | 100%   | 100%    |
| <b>FMMLOGG</b>    | 98%         | 100%   | 100%    |
| <b>FMMSQRTG</b>   | 97%         | 100%   | 100%    |
| <b>EEE</b>        | 69%         | 100%   | 100%    |
| <b>CDEM</b>       | 48%         | 100%   | 100%    |
| <b>CDEO</b>       | 6%          | 89%    | 99%     |

Table B1: Results Pearson correlation coefficient tests (percentage rejected at 5% significance level)

|                   | <b>MPE (£)</b> | <b>MAPE (£)</b> | <b>RMSE</b> |
|-------------------|----------------|-----------------|-------------|
| <b>OLS</b>        | -6.19          | 1815.31         | 4460.42     |
| <b>LOGOLSHET</b>  | -149.73        | 1811.87         | 4938.27     |
| <b>SQRTOLSHET</b> | -5.63          | 1715.94         | 4421.70     |
| <b>GLMLOGP</b>    | -6.77          | 1738.14         | 4522.67     |
| <b>GLMLOGG</b>    | -155.09        | 1813.78         | 4960.21     |
| <b>GLMSQRTP</b>   | -5.51          | 1699.16         | 4416.51     |
| <b>GLMSQRTG</b>   | 41.14          | 1685.78         | 4447.57     |
| <b>LOGNORM</b>    | 59.19          | 1732.46         | 4817.63     |
| <b>GG</b>         | 43.26          | 1747.08         | 4743.14     |
| <b>GB2LOG</b>     | -68.96         | 1794.72         | 4865.08     |
| <b>GB2SQRT</b>    | 131.03         | 1684.73         | 4480.02     |
| <b>FMMLOGG</b>    | -1.94          | 1747.21         | 4728.73     |
| <b>FMMSQRTG</b>   | 136.06         | 1672.63         | 4461.85     |
| <b>EEE</b>        | -39.21         | 1716.71         | 4483.11     |
| <b>CDEM</b>       | -4.80          | 1677.85         | 4433.55     |
| <b>CDEO</b>       | -15.66         | 1724.60         | 4471.24     |

Table B2: Results of model performance, when all converged, sample size 10,000

|                   | <b>MPE (£)</b> | <b>MAPE (£)</b> | <b>RMSE</b> |
|-------------------|----------------|-----------------|-------------|
| <b>OLS</b>        | -1.81          | 1796.18         | 4449.72     |
| <b>LOGOLSHET</b>  | -147.59        | 1802.19         | 4906.22     |
| <b>SQRTOLSHET</b> | -1.67          | 1703.75         | 4413.87     |
| <b>GLMLOGP</b>    | -1.27          | 1725.75         | 4495.21     |
| <b>GLMLOGG</b>    | -151.88        | 1804.52         | 4924.32     |
| <b>GLMSQRTP</b>   | -1.64          | 1690.68         | 4409.46     |
| <b>GLMSQRTG</b>   | 44.49          | 1679.73         | 4442.24     |
| <b>LOGNORM</b>    | 64.37          | 1726.74         | 4795.49     |
| <b>GG</b>         | 52.19          | 1739.61         | 4721.18     |
| <b>GB2LOG</b>     | -59.70         | 1786.85         | 4838.97     |
| <b>GB2SQRT</b>    | 135.16         | 1681.21         | 4478.19     |
| <b>FMMLOGG</b>    | -1.78          | 1739.02         | 4707.86     |
| <b>FMMSQRTG</b>   | 139.06         | 1663.82         | 4453.58     |
| <b>EEE</b>        | -27.50         | 1703.97         | 4461.69     |
| <b>CDEM</b>       | -1.77          | 1671.65         | 4427.06     |
| <b>CDEO</b>       | -12.33         | 1721.03         | 4468.20     |

Table B3: Results of model performance, when all converged, sample size 50,000

|                   | <b>MPE (<math>\mathcal{L}</math>)</b> | <b>MAPE (<math>\mathcal{L}</math>)</b> | <b>RMSE</b> |
|-------------------|---------------------------------------|----------------------------------------|-------------|
| <b>OLS</b>        | -1.38                                 | 1793.94                                | 4448.34     |
| <b>LOGOLSHET</b>  | -145.55                               | 1799.78                                | 4894.66     |
| <b>SQRTOLSHET</b> | -1.13                                 | 1702.17                                | 4412.80     |
| <b>GLMLOGP</b>    | -0.23                                 | 1723.93                                | 4491.04     |
| <b>GLMLOGG</b>    | -149.34                               | 1801.91                                | 4911.21     |
| <b>GLMSQRTP</b>   | -1.08                                 | 1689.60                                | 4408.53     |
| <b>GLMSQRTG</b>   | 45.22                                 | 1679.03                                | 4441.85     |
| <b>LOGNORM</b>    | 64.92                                 | 1725.98                                | 4792.42     |
| <b>GG</b>         | 52.96                                 | 1738.69                                | 4718.07     |
| <b>GB2LOG</b>     | -59.08                                | 1785.98                                | 4835.64     |
| <b>GB2SQRT</b>    | 135.08                                | 1680.93                                | 4477.82     |
| <b>FMMLGG</b>     | 0.10                                  | 1737.17                                | 4702.38     |
| <b>FMMSQRTG</b>   | 140.53                                | 1662.90                                | 4453.24     |
| <b>EEE</b>        | -23.27                                | 1700.90                                | 4456.40     |
| <b>CDEM</b>       | -1.26                                 | 1670.77                                | 4426.08     |
| <b>CDEO</b>       | -11.73                                | 1720.51                                | 4467.82     |

Table B4: Results of model performance, when all converged, sample size 100,000

| Model             | Decile of predicted cost |         |         |         |         |         |         |         |         |          |
|-------------------|--------------------------|---------|---------|---------|---------|---------|---------|---------|---------|----------|
|                   | 1                        | 2       | 3       | 4       | 5       | 6       | 7       | 8       | 9       | 10       |
| <b>OLS</b>        | 878.41                   | 498.24  | 301.60  | 177.47  | -103.47 | -218.87 | -417.56 | -627.31 | -674.45 | 169.25   |
| <b>LOGOLSJET</b>  | 72.19                    | -41.42  | -90.06  | -82.74  | -18.47  | 81.12   | 158.80  | 294.32  | 356.78  | -2135.90 |
| <b>SQRTOLSJET</b> | 366.18                   | 137.92  | 18.07   | -9.74   | -104.61 | -152.77 | -140.83 | -199.66 | -147.44 | 233.38   |
| <b>GLMLOGP</b>    | 23.56                    | -107.43 | -149.27 | -105.00 | -71.83  | -124.65 | 60.05   | 209.83  | 427.23  | -176.98  |
| <b>GLMLOGG</b>    | 50.81                    | -52.36  | -96.95  | -79.00  | -12.05  | 94.98   | 162.95  | 304.74  | 364.94  | -2211.47 |
| <b>GLMSQRTP</b>   | 223.58                   | 58.94   | -24.00  | -35.27  | -59.78  | -92.82  | -82.67  | -114.25 | -60.64  | 189.14   |
| <b>GLMSQRTG</b>   | 124.08                   | 20.66   | -59.16  | -84.72  | -22.72  | -9.06   | -54.07  | -27.41  | 71.68   | 507.66   |
| <b>LOGNORM</b>    | -38.43                   | -99.80  | -131.68 | -43.98  | 97.28   | 230.40  | 300.73  | 510.15  | 782.57  | -964.60  |
| <b>GG</b>         | -143.01                  | -210.11 | -203.73 | -128.22 | 59.81   | 146.80  | 217.61  | 454.21  | 789.59  | -536.75  |
| <b>GB2LOG</b>     | -157.20                  | -222.93 | -219.12 | -154.65 | 45.15   | 111.74  | 155.70  | 371.60  | 642.29  | -1212.01 |
| <b>GB2SQRT</b>    | -50.69                   | -114.56 | -132.83 | -109.30 | 59.73   | 6.65    | -44.19  | 134.96  | 396.12  | 1202.57  |
| <b>FMMLOGG</b>    | -1.93                    | -98.99  | -135.11 | -105.46 | -34.17  | 36.82   | 179.35  | 373.03  | 596.01  | -841.44  |
| <b>FMMSQRTG</b>   | 75.97                    | -25.76  | -89.96  | -103.93 | -45.77  | -31.70  | -1.11   | 78.45   | 260.96  | 1100.74  |
| <b>EEE</b>        | 91.79                    | 0.36    | -59.09  | -62.56  | 6.34    | 75.45   | 46.98   | 94.32   | 103.54  | -720.37  |
| <b>CDEM</b>       | -16.33                   | -40.35  | -73.86  | -18.31  | 69.14   | 144.93  | 79.88   | -34.04  | -302.29 | 200.10   |
| <b>CDEO</b>       | -111.98                  | -176.27 | -213.31 | -162.65 | 3.14    | 63.10   | 71.40   | 163.83  | 212.48  | 48.96    |

Table B5: Models' average mean prediction error ( $\mathcal{L}$ ) by decile of predicted cost at sample size 5,000

| Model             | Decile of predicted cost |         |         |         |         |         |         |         |         |          |
|-------------------|--------------------------|---------|---------|---------|---------|---------|---------|---------|---------|----------|
|                   | 1                        | 2       | 3       | 4       | 5       | 6       | 7       | 8       | 9       | 10       |
| <b>OLS</b>        | 821.88                   | 469.46  | 293.66  | 173.65  | -134.52 | -228.16 | -434.91 | -634.77 | -668.78 | 279.44   |
| <b>LOGOLSHET</b>  | 59.60                    | -52.01  | -106.49 | -95.15  | -30.01  | 67.37   | 156.75  | 280.35  | 346.95  | -2124.82 |
| <b>SQRTOLSHET</b> | 333.52                   | 114.76  | -5.18   | -16.99  | -118.91 | -169.77 | -144.20 | -200.53 | -145.95 | 296.31   |
| <b>GLMLOGP</b>    | -7.46                    | -138.57 | -177.80 | -109.04 | -69.16  | -162.94 | 55.85   | 200.82  | 417.45  | -76.94   |
| <b>GLMLOGG</b>    | 40.74                    | -61.02  | -109.44 | -89.01  | -26.68  | 83.26   | 160.16  | 288.70  | 354.38  | -2192.10 |
| <b>GLMSQRTP</b>   | 213.91                   | 46.63   | -39.07  | -36.10  | -76.04  | -109.29 | -90.19  | -119.35 | -71.38  | 225.44   |
| <b>GLMSQRTG</b>   | 116.40                   | 12.89   | -73.70  | -100.94 | -47.57  | 12.06   | -87.90  | -33.00  | 71.34   | 541.61   |
| <b>LOGNORM</b>    | -44.86                   | -103.90 | -143.50 | -43.17  | 85.94   | 235.45  | 284.50  | 508.01  | 782.45  | -968.86  |
| <b>GG</b>         | -144.37                  | -226.13 | -201.47 | -144.25 | 68.16   | 134.43  | 215.00  | 461.44  | 792.23  | -522.18  |
| <b>GB2LOG</b>     | -159.65                  | -237.28 | -216.89 | -171.23 | 52.58   | 96.44   | 153.83  | 375.92  | 640.54  | -1223.68 |
| <b>GB2SQRT</b>    | -55.62                   | -123.94 | -128.14 | -126.20 | 71.97   | -5.73   | -57.67  | 130.66  | 400.15  | 1204.90  |
| <b>FMMLGG</b>     | -15.44                   | -115.07 | -151.67 | -104.54 | -49.12  | 10.19   | 187.04  | 366.43  | 605.81  | -753.02  |
| <b>FMMSQRTG</b>   | 66.90                    | -35.99  | -105.13 | -132.67 | -68.87  | -24.54  | -10.48  | 84.48   | 326.12  | 1260.66  |
| <b>EEE</b>        | 85.26                    | -9.14   | -74.40  | -82.26  | -25.88  | 88.86   | 17.44   | 97.27   | 116.52  | -605.90  |
| <b>CDEM</b>       | -34.26                   | -43.05  | -87.72  | -22.54  | 58.40   | 143.35  | 68.13   | -49.86  | -328.54 | 248.16   |
| <b>CDEO</b>       | -119.90                  | -182.20 | -225.87 | -162.25 | -17.17  | 60.67   | 64.90   | 165.18  | 215.17  | 44.94    |

Table B6: Models' average mean prediction error (£) by decile of predicted cost at sample size 10,000

| Model             | Decile of predicted cost |         |         |         |         |         |         |         |         |          |
|-------------------|--------------------------|---------|---------|---------|---------|---------|---------|---------|---------|----------|
|                   | 1                        | 2       | 3       | 4       | 5       | 6       | 7       | 8       | 9       | 10       |
| <b>OLS</b>        | 768.06                   | 444.90  | 261.71  | 211.65  | -162.65 | -224.78 | -436.43 | -629.07 | -636.96 | 384.46   |
| <b>LOGOLSHET</b>  | 40.66                    | -63.18  | -120.65 | -98.74  | -27.11  | 71.95   | 154.10  | 278.92  | 354.17  | -2066.07 |
| <b>SQRTOLSHET</b> | 296.11                   | 104.74  | -34.85  | 5.55    | -141.65 | -177.56 | -129.95 | -175.76 | -131.53 | 367.73   |
| <b>GLMLOGP</b>    | -37.97                   | -170.27 | -203.77 | -117.15 | -50.17  | -178.15 | 68.46   | 183.92  | 429.62  | 62.80    |
| <b>GLMLOGG</b>    | 26.92                    | -70.31  | -119.89 | -90.86  | -25.44  | 83.54   | 158.30  | 285.66  | 358.34  | -2125.11 |
| <b>GLMSQRTP</b>   | 198.14                   | 37.23   | -51.29  | -24.78  | -93.41  | -109.47 | -92.28  | -101.31 | -66.36  | 286.77   |
| <b>GLMSQRTG</b>   | 104.24                   | 7.93    | -83.75  | -100.93 | -64.08  | 42.70   | -117.01 | -23.52  | 82.48   | 596.56   |
| <b>LOGNORM</b>    | -54.04                   | -111.30 | -144.41 | -41.15  | 81.71   | 236.05  | 269.16  | 515.50  | 789.18  | -896.86  |
| <b>GG</b>         | -141.90                  | -238.99 | -202.57 | -154.60 | 77.50   | 113.44  | 230.59  | 469.88  | 804.80  | -435.95  |
| <b>GB2LOG</b>     | -160.65                  | -245.80 | -215.95 | -181.97 | 61.39   | 72.92   | 174.47  | 382.37  | 657.11  | -1140.59 |
| <b>GB2SQRT</b>    | -60.75                   | -130.80 | -119.73 | -129.98 | 82.93   | -11.39  | -68.85  | 138.36  | 413.63  | 1238.06  |
| <b>FMMLGG</b>     | -34.22                   | -125.95 | -161.88 | -93.53  | -49.81  | -1.79   | 213.11  | 362.77  | 611.62  | -738.07  |
| <b>FMMSQRTG</b>   | 56.60                    | -38.19  | -119.91 | -132.29 | -76.54  | -11.73  | -25.19  | 87.49   | 338.81  | 1311.47  |
| <b>EEE</b>        | 76.23                    | -17.18  | -84.60  | -87.23  | -43.18  | 103.90  | -12.48  | 106.24  | 136.25  | -453.13  |
| <b>CDEM</b>       | -47.07                   | -43.60  | -101.08 | -24.31  | 48.17   | 145.44  | 57.68   | -56.54  | -339.01 | 342.65   |
| <b>CDEO</b>       | -130.29                  | -190.45 | -234.35 | -156.66 | -29.08  | 45.46   | 73.90   | 169.07  | 233.67  | 95.50    |

Table B7: Models' average mean prediction error (£) by decile of predicted cost at sample size 50,000

| Model             | Decile of predicted cost |         |         |         |         |         |         |         |         |          |
|-------------------|--------------------------|---------|---------|---------|---------|---------|---------|---------|---------|----------|
|                   | 1                        | 2       | 3       | 4       | 5       | 6       | 7       | 8       | 9       | 10       |
| <b>OLS</b>        | 761.33                   | 441.25  | 263.68  | 211.50  | -166.68 | -225.62 | -434.71 | -628.76 | -633.12 | 396.37   |
| <b>LOGOLSHET</b>  | 38.30                    | -62.53  | -125.03 | -100.31 | -27.79  | 72.07   | 150.17  | 280.03  | 355.76  | -2036.25 |
| <b>SQRTOLSHET</b> | 290.94                   | 106.72  | -45.14  | 6.63    | -146.40 | -177.43 | -131.87 | -166.39 | -127.88 | 378.95   |
| <b>GLMLOGP</b>    | -41.05                   | -173.23 | -207.74 | -119.94 | -47.60  | -178.91 | 70.02   | 178.29  | 432.38  | 85.42    |
| <b>GLMLOGG</b>    | 25.07                    | -69.95  | -123.63 | -93.28  | -24.34  | 81.28   | 155.48  | 285.85  | 360.55  | -2090.44 |
| <b>GLMSQRTP</b>   | 196.89                   | 35.30   | -54.10  | -23.58  | -98.07  | -116.64 | -90.84  | -95.65  | -64.14  | 299.60   |
| <b>GLMSQRTG</b>   | 102.64                   | 7.06    | -85.09  | -104.71 | -66.86  | 47.18   | -125.79 | -18.43  | 85.42   | 610.59   |
| <b>LOGNORM</b>    | -54.69                   | -112.28 | -143.09 | -42.46  | 81.70   | 237.09  | 264.89  | 516.00  | 789.82  | -887.70  |
| <b>GG</b>         | -140.56                  | -241.55 | -200.69 | -157.87 | 76.96   | 109.26  | 233.94  | 468.15  | 806.01  | -423.72  |
| <b>GB2LOG</b>     | -159.90                  | -247.54 | -214.15 | -185.09 | 59.92   | 65.76   | 180.76  | 380.80  | 659.11  | -1130.20 |
| <b>GB2SQRT</b>    | -61.84                   | -131.53 | -119.32 | -130.27 | 81.62   | -11.40  | -72.45  | 139.53  | 414.41  | 1241.97  |
| <b>FMMLGG</b>     | -35.47                   | -126.45 | -164.61 | -88.71  | -57.36  | -9.50   | 218.23  | 360.09  | 615.49  | -710.66  |
| <b>FMMSQRTG</b>   | 54.01                    | -39.31  | -124.91 | -136.39 | -76.82  | -10.32  | -31.55  | 92.74   | 344.52  | 1333.18  |
| <b>EEE</b>        | 76.77                    | -19.28  | -85.65  | -91.64  | -45.13  | 95.20   | -15.34  | 106.00  | 141.78  | -395.60  |
| <b>CDEM</b>       | -48.70                   | -44.60  | -101.13 | -24.65  | 46.88   | 145.68  | 55.88   | -58.64  | -339.60 | 356.41   |
| <b>CDEO</b>       | -131.91                  | -189.53 | -236.78 | -153.91 | -33.74  | 44.92   | 73.75   | 171.04  | 236.17  | 102.71   |

Table B8: Models' average mean prediction error ( $\mathcal{L}$ ) by decile of predicted cost at sample size 100,000

| Model             | Decile of predicted cost |        |        |        |         |         |         |         |         |         |
|-------------------|--------------------------|--------|--------|--------|---------|---------|---------|---------|---------|---------|
|                   | 1                        | 2      | 3      | 4      | 5       | 6       | 7       | 8       | 9       | 10      |
| <b>OLS</b>        | 879.77                   | 575.57 | 639.97 | 864.80 | 1120.42 | 1530.58 | 1953.91 | 2437.88 | 3165.22 | 5167.22 |
| <b>LOGOLSHET</b>  | 432.16                   | 567.71 | 690.35 | 825.97 | 1038.71 | 1341.88 | 1702.04 | 2181.12 | 2896.97 | 6490.37 |
| <b>SQRTOLSHET</b> | 472.78                   | 530.79 | 673.13 | 878.29 | 1104.90 | 1427.97 | 1839.97 | 2275.21 | 2969.18 | 5088.17 |
| <b>GLMLOGP</b>    | 472.76                   | 624.62 | 749.98 | 916.79 | 1127.15 | 1354.09 | 1737.56 | 2192.54 | 2871.79 | 5438.02 |
| <b>GLMLOGG</b>    | 431.11                   | 564.87 | 686.22 | 824.57 | 1032.54 | 1341.37 | 1692.92 | 2175.93 | 2895.86 | 6536.24 |
| <b>GLMSQRTP</b>   | 410.47                   | 531.24 | 669.20 | 853.52 | 1093.50 | 1405.85 | 1801.24 | 2242.47 | 2942.28 | 5098.81 |
| <b>GLMSQRTG</b>   | 407.94                   | 522.60 | 655.95 | 849.47 | 1084.61 | 1415.75 | 1778.61 | 2244.43 | 2950.61 | 4983.76 |
| <b>LOGNORM</b>    | 500.51                   | 580.15 | 657.62 | 833.68 | 1056.19 | 1325.01 | 1625.88 | 2065.70 | 2789.91 | 5907.09 |
| <b>GG</b>         | 601.19                   | 640.44 | 733.21 | 888.59 | 1143.62 | 1368.59 | 1622.82 | 2046.71 | 2761.63 | 5701.97 |
| <b>GB2LOG</b>     | 607.97                   | 648.02 | 740.91 | 899.20 | 1163.18 | 1389.65 | 1633.55 | 2067.98 | 2790.67 | 6028.71 |
| <b>GB2SQRT</b>    | 544.30                   | 584.86 | 701.04 | 922.90 | 1220.87 | 1420.87 | 1672.45 | 2142.12 | 2837.97 | 4818.24 |
| <b>FMMLOGG</b>    | 455.63                   | 598.45 | 722.83 | 869.04 | 1070.73 | 1338.32 | 1691.78 | 2150.84 | 2837.05 | 5846.93 |
| <b>FMMSQRTG</b>   | 422.12                   | 556.24 | 696.00 | 879.97 | 1116.32 | 1413.42 | 1772.12 | 2217.32 | 2910.98 | 4919.30 |
| <b>EEE</b>        | 415.25                   | 531.62 | 651.85 | 836.66 | 1049.22 | 1386.31 | 1739.97 | 2225.07 | 2966.02 | 5471.84 |
| <b>CDEM</b>       | 476.96                   | 555.78 | 639.96 | 780.26 | 1019.69 | 1335.12 | 1683.51 | 2213.41 | 3013.70 | 5116.58 |
| <b>CDEO</b>       | 576.63                   | 626.78 | 717.86 | 889.49 | 1142.60 | 1409.13 | 1694.02 | 2146.64 | 2915.21 | 5137.76 |

Table B9: Models' average mean absolute prediction error (£) by decile of predicted cost at sample size 5,000



| Model             | Decile of predicted cost |        |        |        |         |         |         |         |         |         |
|-------------------|--------------------------|--------|--------|--------|---------|---------|---------|---------|---------|---------|
|                   | 1                        | 2      | 3      | 4      | 5       | 6       | 7       | 8       | 9       | 10      |
| <b>OLS</b>        | 823.15                   | 555.90 | 631.90 | 860.48 | 1101.13 | 1540.49 | 1950.52 | 2427.09 | 3139.43 | 5123.35 |
| <b>LOGOLSHET</b>  | 431.30                   | 567.50 | 688.57 | 816.60 | 1031.93 | 1331.88 | 1709.15 | 2170.82 | 2891.03 | 6480.89 |
| <b>SQRTOLSHET</b> | 451.16                   | 528.18 | 664.82 | 878.72 | 1089.47 | 1422.35 | 1840.52 | 2266.38 | 2951.12 | 5067.67 |
| <b>GLMLOGP</b>    | 477.64                   | 625.26 | 746.17 | 906.93 | 1131.35 | 1337.55 | 1734.70 | 2182.37 | 2859.00 | 5381.39 |
| <b>GLMLOGG</b>    | 431.00                   | 565.77 | 684.20 | 819.89 | 1023.22 | 1333.50 | 1701.53 | 2167.19 | 2890.53 | 6521.88 |
| <b>GLMSQRTP</b>   | 405.98                   | 531.14 | 661.24 | 856.03 | 1079.96 | 1400.72 | 1803.69 | 2236.63 | 2930.65 | 5086.55 |
| <b>GLMSQRTG</b>   | 406.69                   | 523.08 | 654.88 | 846.33 | 1064.11 | 1435.75 | 1765.19 | 2241.50 | 2942.36 | 4978.86 |
| <b>LOGNORM</b>    | 502.29                   | 582.93 | 648.20 | 841.26 | 1049.65 | 1324.72 | 1618.63 | 2064.72 | 2789.15 | 5903.89 |
| <b>GG</b>         | 607.39                   | 633.99 | 727.07 | 887.22 | 1142.93 | 1353.45 | 1624.78 | 2046.48 | 2756.94 | 5691.36 |
| <b>GB2LOG</b>     | 614.49                   | 642.18 | 734.34 | 900.43 | 1159.46 | 1376.05 | 1637.34 | 2068.12 | 2787.27 | 6028.33 |
| <b>GB2SQRT</b>    | 549.51                   | 580.31 | 696.52 | 918.68 | 1229.69 | 1411.57 | 1668.49 | 2140.93 | 2835.99 | 4816.42 |
| <b>FMMLOGG</b>    | 460.53                   | 598.19 | 720.21 | 864.41 | 1059.81 | 1314.83 | 1694.76 | 2139.13 | 2823.88 | 5797.27 |
| <b>FMMSQRTG</b>   | 424.65                   | 554.36 | 697.88 | 868.73 | 1084.75 | 1416.72 | 1760.39 | 2185.57 | 2866.85 | 4867.40 |
| <b>EEE</b>        | 413.78                   | 534.75 | 653.24 | 833.36 | 1025.46 | 1399.82 | 1727.13 | 2217.48 | 2948.43 | 5414.48 |
| <b>CDEM</b>       | 478.12                   | 554.96 | 638.92 | 778.62 | 1017.52 | 1334.62 | 1678.98 | 2206.38 | 3002.68 | 5088.50 |
| <b>CDEO</b>       | 581.02                   | 628.72 | 709.23 | 898.91 | 1127.09 | 1411.07 | 1695.33 | 2146.62 | 2915.49 | 5133.30 |

Table B10: Models' average mean absolute prediction error ( $\pounds$ ) by decile of predicted cost at sample size 10,000

| Model             | Decile of predicted cost |        |        |        |         |         |         |         |         |         |
|-------------------|--------------------------|--------|--------|--------|---------|---------|---------|---------|---------|---------|
|                   | 1                        | 2      | 3      | 4      | 5       | 6       | 7       | 8       | 9       | 10      |
| <b>OLS</b>        | 768.85                   | 541.26 | 610.06 | 881.75 | 1069.10 | 1551.55 | 1933.73 | 2409.88 | 3113.74 | 5082.23 |
| <b>LOGOLSHET</b>  | 429.58                   | 561.83 | 688.53 | 807.53 | 1024.78 | 1329.72 | 1704.85 | 2164.61 | 2880.53 | 6430.87 |
| <b>SQRTOLSHET</b> | 422.32                   | 539.92 | 640.41 | 893.53 | 1058.08 | 1413.50 | 1840.22 | 2257.59 | 2931.13 | 5041.73 |
| <b>GLMLOGP</b>    | 480.08                   | 618.62 | 756.96 | 878.99 | 1138.11 | 1328.83 | 1746.09 | 2149.72 | 2853.08 | 5307.87 |
| <b>GLMLOGG</b>    | 431.81                   | 560.11 | 684.30 | 814.80 | 1015.15 | 1331.36 | 1698.38 | 2162.99 | 2879.88 | 6467.43 |
| <b>GLMSQRTP</b>   | 396.93                   | 534.22 | 650.66 | 866.29 | 1055.36 | 1395.82 | 1798.02 | 2233.11 | 2914.62 | 5062.77 |
| <b>GLMSQRTG</b>   | 405.92                   | 521.15 | 647.28 | 852.27 | 1039.32 | 1459.18 | 1744.01 | 2236.95 | 2932.55 | 4959.75 |
| <b>LOGNORM</b>    | 500.44                   | 584.59 | 645.16 | 844.44 | 1053.92 | 1318.84 | 1609.03 | 2065.50 | 2783.57 | 5862.68 |
| <b>GG</b>         | 611.60                   | 629.46 | 722.95 | 877.98 | 1144.29 | 1330.65 | 1638.31 | 2042.62 | 2750.67 | 5648.39 |
| <b>GB2LOG</b>     | 619.63                   | 635.77 | 732.23 | 894.72 | 1155.89 | 1352.95 | 1654.53 | 2062.14 | 2782.81 | 5978.79 |
| <b>GB2SQRT</b>    | 553.94                   | 575.79 | 690.26 | 919.19 | 1235.06 | 1399.53 | 1658.93 | 2139.57 | 2830.54 | 4810.14 |
| <b>FMMLOGG</b>    | 461.64                   | 596.10 | 713.92 | 864.25 | 1043.18 | 1293.90 | 1704.38 | 2120.48 | 2810.22 | 5783.08 |
| <b>FMMSQRTG</b>   | 426.90                   | 554.34 | 687.22 | 870.68 | 1059.59 | 1428.87 | 1739.51 | 2170.59 | 2851.74 | 4849.70 |
| <b>EEE</b>        | 412.88                   | 535.05 | 649.33 | 837.32 | 1004.28 | 1413.33 | 1708.59 | 2212.19 | 2930.73 | 5337.10 |
| <b>CDEM</b>       | 474.76                   | 556.18 | 640.39 | 776.69 | 1017.12 | 1337.97 | 1671.41 | 2201.47 | 2990.46 | 5050.98 |
| <b>CDEO</b>       | 584.29                   | 627.26 | 708.12 | 905.02 | 1116.05 | 1402.84 | 1704.46 | 2140.35 | 2913.49 | 5109.27 |

Table B11: Models' average mean absolute prediction error ( $\pounds$ ) by decile of predicted cost at sample size 50,000

| Model             | Decile of predicted cost |        |        |        |         |         |         |         |         |         |
|-------------------|--------------------------|--------|--------|--------|---------|---------|---------|---------|---------|---------|
|                   | 1                        | 2      | 3      | 4      | 5       | 6       | 7       | 8       | 9       | 10      |
| <b>OLS</b>        | 761.93                   | 538.22 | 613.63 | 882.50 | 1061.12 | 1553.78 | 1932.49 | 2407.91 | 3111.01 | 5077.11 |
| <b>LOGOLSHET</b>  | 430.25                   | 562.48 | 687.36 | 805.11 | 1025.77 | 1329.85 | 1703.25 | 2165.65 | 2877.75 | 6411.24 |
| <b>SQRTOLSHET</b> | 418.79                   | 544.34 | 632.39 | 898.00 | 1053.61 | 1411.66 | 1839.24 | 2258.54 | 2928.42 | 5037.66 |
| <b>GLMLOGP</b>    | 481.31                   | 616.64 | 760.43 | 872.17 | 1138.80 | 1329.53 | 1749.36 | 2141.91 | 2853.14 | 5296.89 |
| <b>GLMLOGG</b>    | 432.92                   | 560.49 | 683.34 | 812.21 | 1017.80 | 1329.84 | 1697.54 | 2163.70 | 2877.59 | 6444.67 |
| <b>GLMSQRTP</b>   | 396.72                   | 535.84 | 647.29 | 869.59 | 1051.08 | 1391.81 | 1798.97 | 2234.50 | 2912.49 | 5058.61 |
| <b>GLMSQRTG</b>   | 407.62                   | 518.79 | 648.16 | 851.77 | 1037.56 | 1462.26 | 1739.84 | 2237.83 | 2931.44 | 4956.07 |
| <b>LOGNORM</b>    | 499.05                   | 585.58 | 645.14 | 842.99 | 1054.22 | 1319.81 | 1607.29 | 2065.35 | 2782.88 | 5858.31 |
| <b>GG</b>         | 613.13                   | 629.43 | 722.41 | 875.78 | 1142.98 | 1327.14 | 1643.17 | 2040.20 | 2749.96 | 5643.64 |
| <b>GB2LOG</b>     | 621.73                   | 634.84 | 732.10 | 893.66 | 1152.43 | 1347.92 | 1661.59 | 2060.34 | 2782.50 | 5973.69 |
| <b>GB2SQRT</b>    | 555.68                   | 575.06 | 688.65 | 919.95 | 1234.31 | 1399.84 | 1656.56 | 2140.01 | 2829.95 | 4810.15 |
| <b>FMMLOGG</b>    | 462.06                   | 595.23 | 714.82 | 867.91 | 1040.55 | 1288.38 | 1707.44 | 2118.45 | 2808.24 | 5769.40 |
| <b>FMMSQRTG</b>   | 426.74                   | 555.77 | 686.13 | 872.24 | 1057.40 | 1432.20 | 1734.65 | 2168.91 | 2850.22 | 4845.77 |
| <b>EEE</b>        | 413.77                   | 533.85 | 651.76 | 836.46 | 1006.16 | 1408.20 | 1710.56 | 2210.26 | 2926.58 | 5312.42 |
| <b>CDEM</b>       | 474.63                   | 554.41 | 641.63 | 776.70 | 1016.61 | 1339.16 | 1670.01 | 2201.30 | 2988.91 | 5045.26 |
| <b>CDEO</b>       | 584.83                   | 627.99 | 705.53 | 907.38 | 1110.80 | 1404.08 | 1705.17 | 2140.17 | 2913.84 | 5106.01 |

Table B12: Models' average mean absolute prediction error ( $\mathcal{L}$ ) by decile of predicted cost at sample size 100,000

|                               | <b>Response surface regressions</b> |                   |                 |                     |
|-------------------------------|-------------------------------------|-------------------|-----------------|---------------------|
| <b>Regression coefficient</b> | <b>MPE</b>                          | <b>LMAPE</b>      | <b>LRMSE</b>    | <b>LADMPE</b>       |
| $\alpha$                      | -2.46<br>(1.87)                     | 7.49<br>(0.00)    | 8.40<br>(0.00)  | 2.11<br>(0.09)      |
| $\beta$                       | -3524.10<br>(32871.71)              | 113.56<br>(15.16) | 31.89<br>(1.98) | 7432.02<br>(773.24) |

Table B13: Regression coefficients for OLS response surface regressions

|                               | <b>Response surface regressions</b> |                  |                  |                     |
|-------------------------------|-------------------------------------|------------------|------------------|---------------------|
| <b>Regression coefficient</b> | <b>MPE</b>                          | <b>LMAPE</b>     | <b>LRMSE</b>     | <b>LADMPE</b>       |
| $\alpha$                      | -148.13<br>(2.31)                   | 7.50<br>(0.00)   | 8.50<br>(0.00)   | 2.29<br>(0.09)      |
| $\beta$                       | 27441.85<br>(40826.75)              | 47.30<br>(11.91) | 64.37<br>(18.59) | 8147.63<br>(717.13) |

Table B14: Regression coefficients for LOGOLSHET response surface regressions

|                               | <b>Response surface regressions</b> |                  |                 |                     |
|-------------------------------|-------------------------------------|------------------|-----------------|---------------------|
| <b>Regression coefficient</b> | <b>MPE</b>                          | <b>LMAPE</b>     | <b>LRMSE</b>    | <b>LADMPE</b>       |
| $\alpha$                      | -2.44<br>(1.88)                     | 7.44<br>(0.00)   | 8.39<br>(0.00)  | 2.11<br>(0.09)      |
| $\beta$                       | 4161.85<br>(33067.30)               | 72.66<br>(10.43) | 23.83<br>(1.29) | 7496.99<br>(828.20) |

Table B15: Regression coefficients for SQRTOLSHET response surface regressions

|                               | <b>Response surface regressions</b> |                 |                 |                     |
|-------------------------------|-------------------------------------|-----------------|-----------------|---------------------|
| <b>Regression coefficient</b> | <b>MPE</b>                          | <b>LMAPE</b>    | <b>LRMSE</b>    | <b>LADMPE</b>       |
| $\alpha$                      | -1.75<br>(1.95)                     | 7.45<br>(0.00)  | 8.41<br>(0.00)  | 2.14<br>(0.09)      |
| $\beta$                       | -8381.67<br>(35203.29)              | 73.77<br>(9.66) | 76.03<br>(7.89) | 7947.14<br>(721.92) |

Table B16: Regression coefficients for GLMLOGP response surface regressions

|                               | <b>Response surface regressions</b> |                  |                  |                     |
|-------------------------------|-------------------------------------|------------------|------------------|---------------------|
| <b>Regression coefficient</b> | <b>MPE</b>                          | <b>LMAPE</b>     | <b>LRMSE</b>     | <b>LADMPE</b>       |
| $\alpha$                      | -151.94<br>(2.37)                   | 7.50<br>(0.00)   | 8.50<br>(0.00)   | 2.37<br>(0.08)      |
| $\beta$                       | 12368.49<br>(41957.46)              | 44.87<br>(12.24) | 72.04<br>(19.88) | 7680.98<br>(735.76) |

Table B17: Regression coefficients for GLMLOGG response surface regressions

|                               | <b>Response surface regressions</b> |                 |                 |                     |
|-------------------------------|-------------------------------------|-----------------|-----------------|---------------------|
| <b>Regression coefficient</b> | <b>MPE</b>                          | <b>LMAPE</b>    | <b>LRMSE</b>    | <b>LADMPE</b>       |
| $\alpha$                      | -2.40<br>(1.87)                     | 7.43<br>(0.00)  | 8.39<br>(0.00)  | 2.11<br>(0.09)      |
| $\beta$                       | 4768.78<br>(33017.63)               | 47.11<br>(8.07) | 21.02<br>(1.08) | 7661.16<br>(707.81) |

Table B18: Regression coefficients for GLMSQRTP response surface regressions

|                               | <b>Response surface regressions</b> |                 |                 |                     |
|-------------------------------|-------------------------------------|-----------------|-----------------|---------------------|
| <b>Regression coefficient</b> | <b>MPE</b>                          | <b>LMAPE</b>    | <b>LRMSE</b>    | <b>LADMPE</b>       |
| $\alpha$                      | 43.86<br>(1.74)                     | 7.43<br>(0.00)  | 8.40<br>(0.00)  | 2.01<br>(0.09)      |
| $\beta$                       | 6300.86<br>(30958.31)               | 32.27<br>(6.43) | 14.78<br>(1.35) | 8004.18<br>(702.89) |

Table B19: Regression coefficients for GLMSQRTG response surface regressions

|                               | <b>Response surface regressions</b> |                 |                 |                     |
|-------------------------------|-------------------------------------|-----------------|-----------------|---------------------|
| <b>Regression coefficient</b> | <b>MPE</b>                          | <b>LMAPE</b>    | <b>LRMSE</b>    | <b>LADMPE</b>       |
| $\alpha$                      | 63.69<br>(1.55)                     | 7.45<br>(0.00)  | 8.47<br>(0.00)  | 1.92<br>(0.08)      |
| $\beta$                       | -6348.01<br>(27826.75)              | 24.95<br>(6.92) | 36.18<br>(9.83) | 8009.81<br>(687.22) |

Table B20: Regression coefficients for LOGNORM response surface regressions

|                               | <b>Response surface regressions</b> |                 |                 |                     |
|-------------------------------|-------------------------------------|-----------------|-----------------|---------------------|
| <b>Regression coefficient</b> | <b>MPE</b>                          | <b>LMAPE</b>    | <b>LRMSE</b>    | <b>LADMPE</b>       |
| $\alpha$                      | 52.17<br>(1.70)                     | 7.46<br>(0.00)  | 8.46<br>(0.00)  | 1.89<br>(0.10)      |
| $\beta$                       | -47610.97<br>(30514.46)             | 36.78<br>(7.41) | 40.14<br>(8.65) | 8123.00<br>(830.41) |

Table B21: Regression coefficients for GG response surface regressions

|                               | <b>Response surface regressions</b> |                  |                  |                     |
|-------------------------------|-------------------------------------|------------------|------------------|---------------------|
| <b>Regression coefficient</b> | <b>MPE</b>                          | <b>LMAPE</b>     | <b>LRMSE</b>     | <b>LADMPE</b>       |
| $\alpha$                      | -60.42<br>(2.21)                    | 7.49<br>(0.00)   | 8.48<br>(0.00)   | 2.29<br>(0.09)      |
| $\beta$                       | -30592.30<br>(41448.16)             | 32.25<br>(10.48) | 40.50<br>(12.11) | 7699.85<br>(733.74) |

Table B22: Regression coefficients for GB2LOG response surface regressions

|                               | <b>Response surface regressions</b> |                 |                |                     |
|-------------------------------|-------------------------------------|-----------------|----------------|---------------------|
| <b>Regression coefficient</b> | <b>MPE</b>                          | <b>LMAPE</b>    | <b>LRMSE</b>   | <b>LADMPE</b>       |
| $\alpha$                      | 134.39<br>(1.62)                    | 7.43<br>(0.00)  | 8.41<br>(0.00) | 2.01<br>(0.08)      |
| $\beta$                       | -4550.79<br>(29380.16)              | 17.68<br>(5.35) | 6.36<br>(1.41) | 7719.11<br>(688.62) |

Table B23: Regression coefficients for GB2SQRT response surface regressions

|                               | <b>Response surface regressions</b> |                  |                  |                     |
|-------------------------------|-------------------------------------|------------------|------------------|---------------------|
| <b>Regression coefficient</b> | <b>MPE</b>                          | <b>LMAPE</b>     | <b>LRMSE</b>     | <b>LADMPE</b>       |
| $\alpha$                      | -0.61<br>(2.70)                     | 7.46<br>(0.00)   | 8.45<br>(0.00)   | 2.44<br>(0.08)      |
| $\beta$                       | -13166.18<br>(50627.97)             | 60.05<br>(14.09) | 83.16<br>(19.16) | 8279.92<br>(757.08) |

Table B24: Regression coefficients for FMMLOGG response surface regressions

|                               | <b>Response surface regressions</b> |                  |                 |                     |
|-------------------------------|-------------------------------------|------------------|-----------------|---------------------|
| <b>Regression coefficient</b> | <b>MPE</b>                          | <b>LMAPE</b>     | <b>LRMSE</b>    | <b>LADMPE</b>       |
| $\alpha$                      | 142.12<br>(2.85)                    | 7.42<br>(0.00)   | 8.40<br>(0.00)  | 2.28<br>(0.07)      |
| $\beta$                       | -93880.38<br>(67740.82)             | 80.92<br>(20.79) | 27.85<br>(6.12) | 7461.19<br>(779.31) |

Table B25: Regression coefficients for FMMSQRTG response surface regressions

|                               | <b>Response surface regressions</b> |                  |                 |                     |
|-------------------------------|-------------------------------------|------------------|-----------------|---------------------|
| <b>Regression coefficient</b> | <b>MPE</b>                          | <b>LMAPE</b>     | <b>LRMSE</b>    | <b>LADMPE</b>       |
| $\alpha$                      | -25.08<br>(2.35)                    | 7.44<br>(0.00)   | 8.40<br>(0.00)  | 2.36<br>(0.08)      |
| $\beta$                       | -96992.48<br>(44199.43)             | 78.57<br>(12.04) | 58.99<br>(7.25) | 7962.63<br>(726.73) |

Table B26: Regression coefficients for EEE response surface regressions

|                               | <b>Response surface regressions</b> |                 |                 |                     |
|-------------------------------|-------------------------------------|-----------------|-----------------|---------------------|
| <b>Regression coefficient</b> | <b>MPE</b>                          | <b>LMAPE</b>    | <b>LRMSE</b>    | <b>LADMPE</b>       |
| $\alpha$                      | -2.52<br>(1.86)                     | 7.42<br>(0.00)  | 8.39<br>(0.00)  | 2.08<br>(0.08)      |
| $\beta$                       | 9424.60<br>(32387.59)               | 39.46<br>(6.22) | 22.01<br>(1.16) | 8165.22<br>(685.22) |

Table B27: Regression coefficients for CDEM response surface regressions

|                               | <b>Response surface regressions</b> |                 |                |                     |
|-------------------------------|-------------------------------------|-----------------|----------------|---------------------|
| <b>Regression coefficient</b> | <b>MPE</b>                          | <b>LMAPE</b>    | <b>LRMSE</b>   | <b>LADMPE</b>       |
| $\alpha$                      | -13.02<br>(1.91)                    | 7.45<br>(0.00)  | 8.40<br>(0.00) | 2.16<br>(0.09)      |
| $\beta$                       | 6579.60<br>(33749.36)               | 15.36<br>(6.44) | 8.26<br>(1.00) | 7808.60<br>(741.31) |

Table B28: Regression coefficients for CDEO response surface regressions
